# Supplementary material for: Respiratory Viral Infection-Induced Microbiome Alterations and Secondary Bacterial Pneumonia
Source: PubMed Central journal article supplement (PMC6250824; doi:10.3389/fimmu.2018.02640), 2018-11-16
Supplement: Table_1.pdf [file Table_1.pdf]

**Table 1. Changes in the microbiome after viral infection**

| Location of microbiome or colonization | Type of evaluation | Without viral infections |                                                                                                                               | virus infections or stimulation | Changes in the bacterial burden, diversity, and host immune response after viral infections                                                                                                                                 | Reference                  |
|----------------------------------------|--------------------|--------------------------|-------------------------------------------------------------------------------------------------------------------------------|---------------------------------|-----------------------------------------------------------------------------------------------------------------------------------------------------------------------------------------------------------------------------|----------------------------|
|                                        |                    | Predominant phyla        | Predominant genera                                                                                                            |                                 |                                                                                                                                                                                                                             |                            |
| nostril                                | qPCR               | —                        | <i>S. pneumoniae</i> (54%)<br><i>M. catarrharis</i> (33%)<br><i>H. influenzae</i> (26%)<br><i>M. catarrlaris</i> 30.0 - 51.7% | Mainly RV                       | ↑ <i>S. pneumoniae</i><br>↑ <i>M. catarrharis</i><br>↑ <i>H. influenzae</i>                                                                                                                                                 | DeMuri et al., 2017        |
| nasopharynx                            | Bacterial culture  | —                        | <i>S. pneumoniae</i> 27.7 - 50.3%<br><i>S. aureus</i> 20.2 - 25.8%<br><i>H. influenzae</i> 12.8 - 41.8%                       | RV<br>adenovirus                | Positive association between:<br>-RV and <i>S. pneumoniae</i> , <i>H. influenzae</i> , and <i>M. catarrharis</i><br>-adenovirus and <i>M. catarrharis</i>                                                                   | Jacoby et al., 2007        |
| nasopharynx                            | Bacterial culture  | —                        | <i>M. catarrlaris</i> 66 - 80%<br><i>S. pneumoniae</i> 50 - 70%<br><i>H. influenzae</i> 34 - 60%<br><i>S. aureus</i> 5 - 16%  | 20 respiratory viruses          | Positive association between:<br>- <i>S. aureus</i> and influenza virus<br>- <i>S. pneumoniae</i> and RV and enterovirus<br>- <i>H. influenzae</i> and RV and RSV<br>- <i>M. catarrharis</i> and coronavirus and adenovirus | van den Bergh et al., 2012 |
| nasopharynx                            | qPCR               | —                        | <i>S. aureus</i> 5%<br><i>S. pneumoniae</i> 11%<br><i>H. influenzae</i> 10%                                                   | Influenza A                     | <i>S. pneumoniae</i> 12%<br><i>S. pneumoniae</i> 24%<br><i>H. Influenzae</i> 32%                                                                                                                                            | Safaeyan et al., 2015      |
| nasopharynx                            | qPCR               | —                        | <i>S. pneumoniae</i><br><i>M. catarrharis</i><br><i>H. influenzae</i><br><i>S. aureus</i>                                     | LAIV                            | LAIV increased the nasal colonization density of <i>S. pneumoniae</i> in subjects who harbored this bacterium at the time of vaccination, and transiently increased rates of colonization by <i>H. influenza</i>            | Thors et al., 2016         |
| nasopharynx                            | 16S rRNA sequence  | —                        | —                                                                                                                             | RV<br>RSV                       | Significant differences in the nasopharyngeal microbiome between patients with RV and RSV<br>↓ <i>S. aureus</i><br>↑ <i>Prevotella</i><br>↑ <i>Streptobacillus</i><br>↑ <i>Porphyromonas</i>                                | Rosas-Salazar et al., 2016 |
| nasopharynx                            | 16S rRNA sequence  | —                        | —                                                                                                                             | Influenza A and B               | ↑ <i>Granulicatella</i><br>↑ <i>Veillonella</i><br>↑ <i>Fusobacterium</i><br>↑ <i>Haemophilus</i><br>-Increased bacterial diversity is associated with influenza severity                                                   | Langevin e al., 2017       |

Abbreviations: RV, rhinovirus; RSV, respiratory syncytial virus; LAIV, live attenuated influenza vaccine

Table 1 (continued)

| Location of microbiome or colonization | Type of evaluation | Without viral infections                       |                                                                                                                                                  | virus infections or stimulation                   | Changes in the bacterial burden, diversity, and host immune response after viral infections                                                                                                                                                                                                                          | Reference              |
|----------------------------------------|--------------------|------------------------------------------------|--------------------------------------------------------------------------------------------------------------------------------------------------|---------------------------------------------------|----------------------------------------------------------------------------------------------------------------------------------------------------------------------------------------------------------------------------------------------------------------------------------------------------------------------|------------------------|
|                                        |                    | Predominant phyla                              | Predominant genera                                                                                                                               |                                                   |                                                                                                                                                                                                                                                                                                                      |                        |
| nasopharynx                            | 16S rRNA sequence  | Actinobacteria<br>Firmicutes<br>Proteobacteria | <i>Corynebacterium</i><br><i>Staphylococcus</i><br><i>Moraxella</i>                                                                              | LAIV                                              | <p>↑<i>Staphylococcus</i><br/>↑<i>Bacteroides</i><br/>-Up-regulation of type I and II IFN-stimulated genes and activation of tpe I IFN-mediated antiviral response may promote the bacterial growth.</p>                                                                                                             | Tarabichi et al., 2015 |
| nasopharynx                            | 16S rRNA sequence  | —                                              | —                                                                                                                                                | Influenza A pdm09                                 | <p>Actinobacteria<br/>Firmicutes<br/>Proteobacteria<br/>-A trend towards increasing diversity with patient age</p>                                                                                                                                                                                                   | Chaban et al., 2013    |
| *nasopharynx                           | Bacterial culture  | —                                              | —                                                                                                                                                | LAIV                                              | <p>↑<i>S. pneumoniae</i><br/>↑<i>S. aureus</i><br/>Type I IFN was increased in the nasopharynx and bonchoalveolar lavage specimens.</p>                                                                                                                                                                              | Mina et al., 2014      |
| nasopharynx                            | 16S rRNA sequence  | Firmicutes<br>Actinobacteria<br>Proteobacteria | <i>Alloiococcus</i><br><i>Corynebacterium</i><br><i>Staphylococcus</i><br><i>Haemophilus</i><br><i>Propionibacterium</i><br><i>Streptococcus</i> | RV                                                | <p>↓<i>Haemophilus</i><br/>↓<i>Neisseria</i><br/>↑<i>Propionibacterium</i></p>                                                                                                                                                                                                                                       | Allen et al., 2014     |
| nasopharynx                            | 16S rRNA sequence  | Proteobacteria<br>Firmicutes<br>Actinobacteria | <i>Streptococcus</i><br><i>Rothia</i><br><i>Prevotella</i>                                                                                       | Influenza A and B<br>RSV<br>RV<br>metapneumovirus | <p>Decreased diversity indices with symptomatic respiratory infection.<br/>↓Anaerobes<br/>↓<i>Prevotella</i><br/>↑<i>S. aureus</i><br/>↑<i>H. Influenzae</i><br/>↑<i>S. Pneumoniae</i><br/>↑<i>M. Catarrharis</i><br/>↑<i>Dol osigranulum pigrum</i><br/>↑<i>Corynebacterium propinquum/pseudodiphtheriticum</i></p> | Edouard et al., 2018   |

Abbreviations: RV, rhinovirus; RSV, respiratory syncytial virus; LAIV, live attenuated influenza vaccine; IFN, interferon; \* Mouse study

Table 1 (continued)

| Location of microbiome                          | Type of evaluation                               | Without viral infections                                        |                                                                                                        | virus infections or stimulation                                                         | Changes in the bacterial burden, diversity, and host immune response after viral infections                                                                                                                                                                                                                     | Reference              |
|-------------------------------------------------|--------------------------------------------------|-----------------------------------------------------------------|--------------------------------------------------------------------------------------------------------|-----------------------------------------------------------------------------------------|-----------------------------------------------------------------------------------------------------------------------------------------------------------------------------------------------------------------------------------------------------------------------------------------------------------------|------------------------|
|                                                 |                                                  | Predominant phyla                                               | Predominant genera                                                                                     |                                                                                         |                                                                                                                                                                                                                                                                                                                 |                        |
| throat                                          | 16S rRNA sequence                                | Firmicutes<br>Bacteroidetes<br>Proteobacteria<br>Actinobacteria | <i>Streptococcus</i><br><i>Prevotella</i><br><i>Veillonella</i><br><i>Rothia</i><br><i>Haemophilus</i> | RV                                                                                      | ↑ <i>H. parainfluenzae</i><br>↑ <i>Neisseria subflava</i><br>↑ <i>S. aureus</i>                                                                                                                                                                                                                                 | Hofstra et al., 2015   |
| oropharynx                                      | Bacterial culture<br>Automated mass spectrometry | Bacteroidetes<br>Proteobacteria<br>Firmicutes                   | <i>Prevotella</i><br><i>Acinetobacter</i>                                                              | Influenza A pdm09                                                                       | ↑ <i>Pseudomonas</i><br>↑ <i>Acinetobacter</i>                                                                                                                                                                                                                                                                  | Leung et al., 2013     |
| oropharynx                                      | 16S rRNA sequence                                | Bacteroidetes<br>Proteobacteria<br>Firmicutes                   | <i>Haemophilus</i><br><i>Bacteroides</i>                                                               | Influenza A (H7N9)                                                                      | Significantly increased diversity compared to healthy controls, particularly H7N9 patients with secondary bacterial pneumonia.                                                                                                                                                                                  | Lu et al., 2017        |
| Mixed URT (nasopharynx, oropharynx, and sputum) | 16S rRNA sequence                                | —                                                               | <i>S. pneumoniae</i>                                                                                   | Influenza<br>Parainfluenza<br>RV<br>RSV<br>Coronavirus<br>adenovirus<br>metapneumovirus | Decreased diversity indices during viral infection.<br>Following 6 types of oropharyngeal microbiome were detected;<br><i>Streptococcus + Prevotella + Veillonella</i><br><i>Streptococcus + Haemophilus + Neisseria</i><br><i>Streptococcus</i><br><i>Moraxella</i><br><i>Haemophilus</i><br><i>Klebsiella</i> | Yi et al., 2014        |
| LRT (induced sputum)                            | 16S rRNA sequence                                | Firmicutes (65%)<br>Bacteroidetes (17%)<br>Proteobacteria (5%)  | <i>Streptococcus</i> (42.5%)<br><i>Veillonella</i> (15.2%)<br><i>Prevotella</i> (15.0%)                | RV                                                                                      | -are not associated with virus type but are linked to the age of subjects.<br>Six-fold increase in bacterial burden.<br>↑Proteobacteria ( <i>H. influenzae</i> )<br>↑Neutrophil concentration<br>↑Neutrophil elastase level                                                                                     | Molyneaux et al., 2013 |
| *LRT                                            | 16S rRNA sequence                                | Firmicutes (90%)                                                | <i>Lactobacillus</i>                                                                                   | Influenza A                                                                             | Minor qualitative change in microbiota and no quantitative impact on bacterial colonization.<br>Robust antimicrobial host response and increased sensitivity to bacterial super-infection.                                                                                                                      | Yildiz et al., 2018    |

Abbreviations: RV, rhinovirus; RSV, respiratory syncytial virus ; IFN, interferon; LRT, lower respiratory tract; \* Mouse study

Table 1 (continued)

| Location of microbiome | Type of evaluation | Without viral infections                                                                          |                                            | virus infections or stimulation | Changes in the bacterial burden, diversity, and host immune response after viral infections                                                                                                                             | Reference            |
|------------------------|--------------------|---------------------------------------------------------------------------------------------------|--------------------------------------------|---------------------------------|-------------------------------------------------------------------------------------------------------------------------------------------------------------------------------------------------------------------------|----------------------|
|                        |                    | Predominant phyla                                                                                 | Predominant genera                         |                                 |                                                                                                                                                                                                                         |                      |
| *Gut                   | 16S rRNA sequence  | Bacteroidetes (71%)                                                                               | <i>S24-7 (Bacteroidia)</i>                 | Influenza A                     | Depletion of bacterial content (↓Bacteroidetes, ↑Firmicutes)<br>Disruption of mucus layer integrity and higher levels of antimicrobial peptides in Paneth cells.                                                        | Yildiz et al., 2018  |
| *Gut                   | 16S rRNA sequence  | Bacteroidetes<br>Firmicutes<br>Tenericutes<br>Actinobacteria<br>Proteobacteria<br>Deferribacteres | —                                          | RSV<br>Influenza                | ↑Bacteroidetes<br>↓Firmicutes                                                                                                                                                                                           | Groves et al., 2018  |
| *Gut                   | 16S rRNA sequence  | Fimicutes<br>Bacteroidetes                                                                        | —                                          | Influenza A (PR8)               | ↑Proteobacteria                                                                                                                                                                                                         | Bartley et al., 2017 |
| *Gut                   | 16S rRNA sequence  | Bacteroidetes<br>Firmicutes                                                                       | <i>S24-7 (Bacteroidia)</i>                 | Influenza A (PR8)               | ↑Proteobacteria<br>-Influenza-induced antiviral type I IFN pathway is partly responsible for the inadequate innate immune cell responses during host defense against secondary bacterial infections.                    | Deriu et al., 2016   |
| *Gut                   | 16S rRNA sequence  | —                                                                                                 | <i>Lactobacillus</i><br><i>Bacteroides</i> | Influenza A (PR8)               | ↓ <i>Lactobacillus</i><br>↑ <i>Enterobacteriaceae</i><br>-Influenza infection altered intestinal microbiota composition, which was mediated by type II IFN produced by lung-derived T cells recruited to the intestine. | Wang et al., 2014    |

Abbreviations: RSV, respiratory syncytial virus ; IFN, interferon; \* Mouse study
